# Supplementary material for: Thermal stability of p-dimethylaminophenylpentazole
Source: Royal Society of Chemistry journal article supplement (doi:10.1039/c4ra08454c), 2014-01-01
Supplement: c4ra08454c1.pdf [file c4ra08454c1.pdf]

1 **Supporting information**

2

3 **Thermal Stability of *p*-Dimethylaminophenylpentazole**

4 Yu-zhang Yang<sup>a</sup>, Yu-chuan Li<sup>a</sup>, Ru-bo Zhang<sup>b</sup>, Cheng-hui Sun<sup>a</sup> and Si-

5 ping Pang<sup>a\*</sup>

6 <sup>a</sup> School of Materials Science & Engineering, Beijing Institute of Technology, South  
7 Street No. 5, Zhongguancun, Haidian District, 100081 Beijing (China)

8 <sup>b</sup> School of Chemistry, Beijing Institute of Technology, South Street No. 5,  
9 Zhongguancun, Haidian District, 100081 Beijing (China)

10

11 **Contents**

12 General Method .....2

13 Synthesis procedure .....2

14 *p*-Dimethylaminophenylpentazole (**1**).....2

15 *p*-Dimethylaminophenylazide (**2**) .....3

16 NMR .....3

17 Mass spectra .....4

18 Decomposition observation .....6

19 Single-crystal X-ray diffraction .....6

20 Calculation detail .....10

21

22

23

24

25

26

## 1 **1. General method**

2 Reagents were purchased from Aladdin and were used as received. <sup>1</sup>H and  
3 <sup>15</sup>N NMR spectra were recorded on a 600 MHz (Bruker AVANCE 600)  
4 nuclear magnetic resonance spectrometer operating at 75 MHz using  
5 CDCl<sub>3</sub> and CD<sub>2</sub>Cl<sub>2</sub> as solvent respectively and locking solvent unless  
6 otherwise stated. IR spectra were recorded using KBr pellets for solids on  
7 a Perkin Elmer Spectrum 400 spectrometer. Gas chromatography mass  
8 spectrum (GC-MS) was performed with a Shimadzu GCMS-QP2010  
9 Ultra. Melting points were determined on an XT4 microscope melting  
10 point apparatus

11

## 12 **2. Synthesis producers**

13 Caution! Although none of the complexes described herein have exploded  
14 or detonated in the course of this research, these materials should be  
15 handled with extreme care using the best safety practices.

16 ***p*-Dimethylaminophenylpentazole (1)** : *p*-Dimethylaminophenylamine  
17 (0.2 g, 1.47 mmol) was dissolved in methanol (4 ml, cooled to 0 °C). HCl  
18 (0.3 ml, 36~38%) was then added. Stirring for 15 min, then water (1 ml)  
19 solution of NaNO<sub>2</sub> (0.12 g, 1.617 mmol) was added during 30 min,  
20 keeping the temperature of the reaction between 2 and 0 °C. The reaction  
21 mixture was then stirred at the same temperature for 1 h. Aether (20 ml, 0  
22 °C) was added into the reaction mixture, the precipitate was separated by  
23 filtration after stirring 20 min. Pure *p*-dimethylaminophenyldiazonium  
24 was obtained by 3 times washing with aether, then dissolved in a mixture  
25 of methanol (15 ml) and hexane (5 ml) cooled to -40 °C by an ethanol  
26 bath. A saturated solution of NaN<sub>3</sub> (0.13 g, 2 mmol) in aqueous MeOH (5  
27 ml, 50%) was added over several minutes. The reaction was stirred  
28 vigorously for 1 h. The reaction suspension was filtered in a fridge (-  
29 35°C). The precipitated deep green-gray product was diluted with cold  
30 methanol (-35 °C 10 ml) for three times. All glass (including filters) and  
31 solutions, used in the following work were cooled to between -60 and -50

1 °C by a cold bath of liquid N<sub>2</sub>. The filter precipitate dried by a vacuum  
2 freezing to yield crude *p*-dimethylaminophenylpentazole (0.125 g, 0.66  
3 mmol) as a shiny gray solid with a yield of 45%.

4 Crude **1** was dissolved in dichloromethane for saturated solution in a  
5 glass bottle. Double ether was added slowly along the wall of bottle by a  
6 syringe. The bottle was sealed and sat at -35 °C. Dark yellow needle crystal  
7 was obtained after 48 h. after methanol washing and vacuum drying, the  
8 pure pale yellow crystal **1** was obtained. This step was carried out at least  
9 2 times, and the bright yellow needle for testing was obtained in a NMR  
10 tube (d = 2.5 mm) with the method above.

11

12 ***p*-Dimethylaminophenylazide (2)** : 0.1 g (0.53 mmol) of Crystal **1** was  
13 preserved in a unsealed flask at room temperature, silver paper was  
14 surrounded the flask for avoiding light. 0.08 g (0.48 mmol) dark green  
15 powder was obtained after a week, yield: 91%, M.p.: 42 °C, *T*<sub>dec</sub>: 156 °C.

16

### 17 **3. NMR**

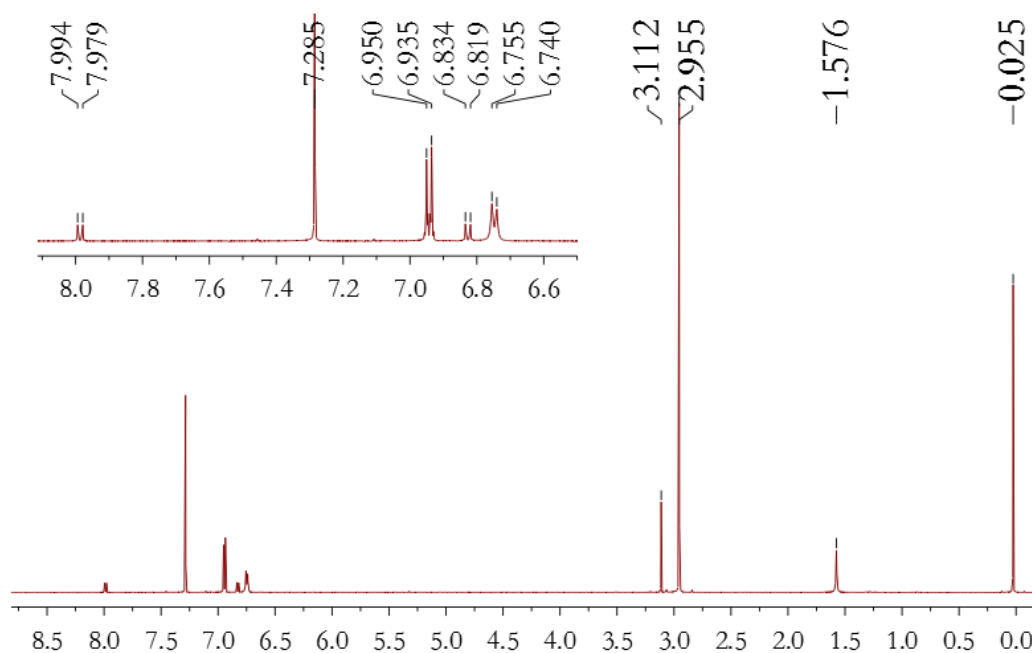

18 **Figure S1.** <sup>1</sup>H NMR spectrum of mixture of **1** and **2** at room temperature.

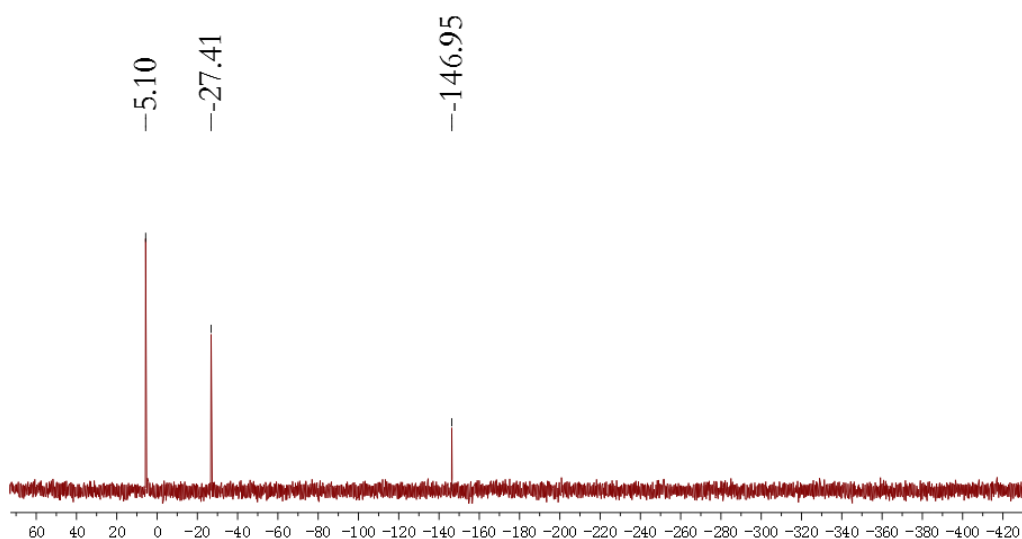

1 **Figure S2.**  $^{15}\text{N}$  NMR spectrum of **1** and **2** at  $-20\text{ }^\circ\text{C}$ .

2

3 **4. Mass spectra**

4 The initial oven temperature was  $30\text{ }^\circ\text{C}$  (held for 3 min), and then  
 5 increased to  $70\text{ }^\circ\text{C}$  at the rate of  $20\text{ }^\circ\text{C}/\text{min}$ , held for 3 min, then  
 6 increased to  $300\text{ }^\circ\text{C}$  at the rate of  $25\text{ }^\circ\text{C}/\text{min}$ , held for 3 min. The total run  
 7 time was 20 min. Mass spectra were performed with a Agilent 6120  
 8 LCMS instrument.

9

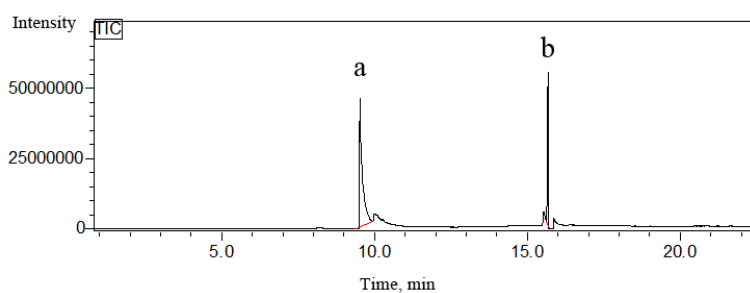

10 **Figure S3.** Chromatograms of GC/MS

11

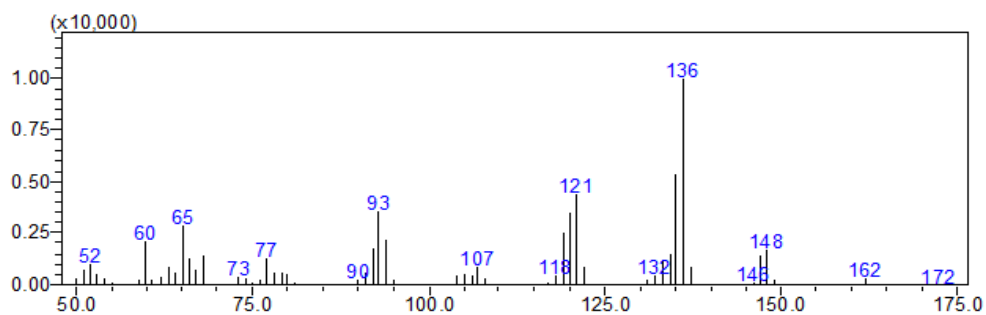

1 **Figure S4.** Mass spectrum of *a* in figure S2.

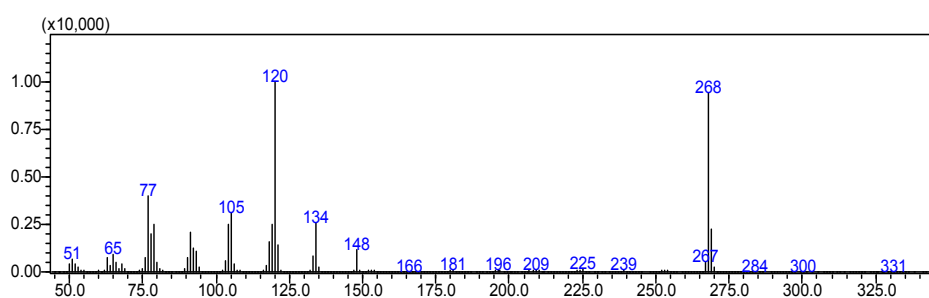

2 **Figure S5.** Mass spectrum of *b* in figure S2.

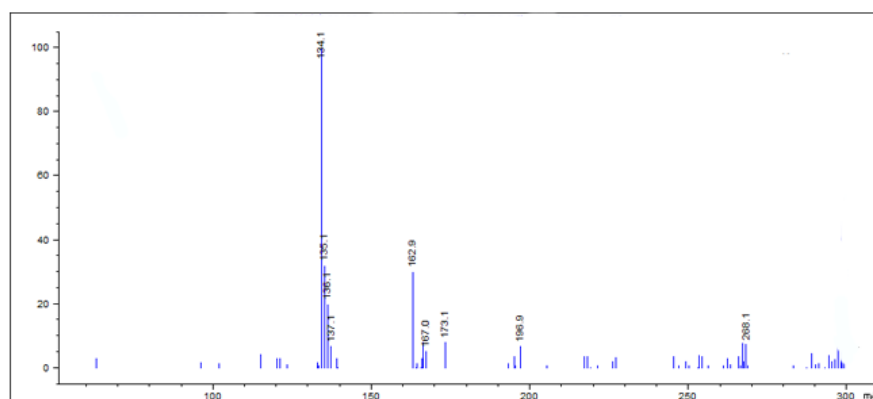

3 **Figure S6.** Mass Spectrum of photolysis product of **2**.

4

5

## 1 5. Decomposition observation

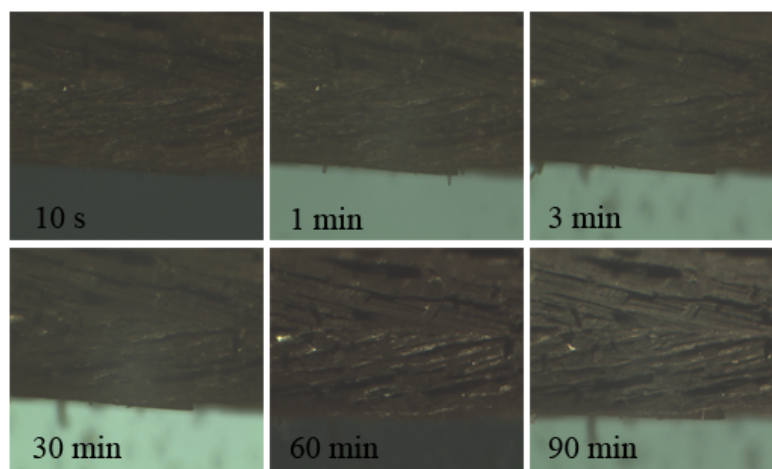

2 **Figure S7.** Microscope images of decomposition process of **1** at room  
3 temperature.

4

## 5 6. Single-crystal X-ray diffraction

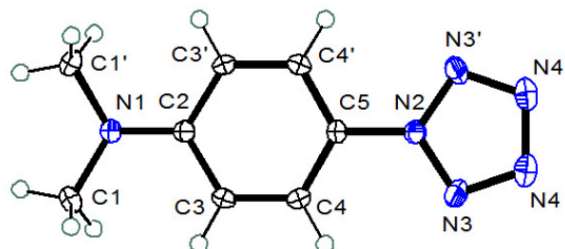

6

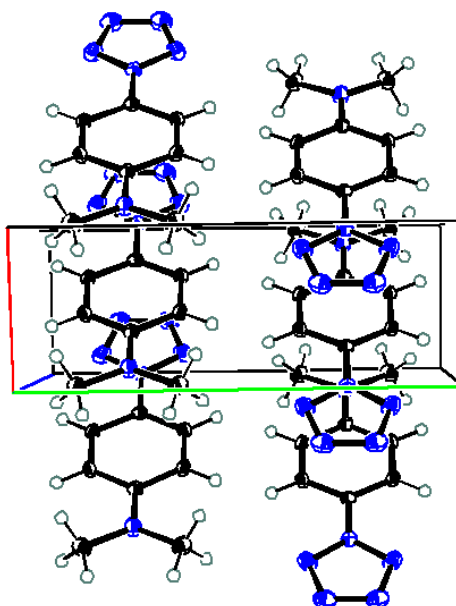

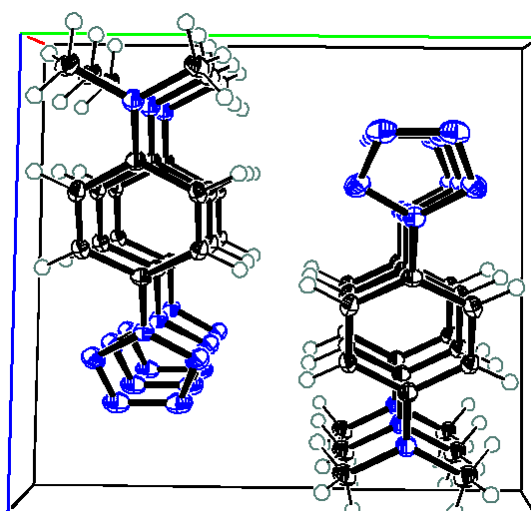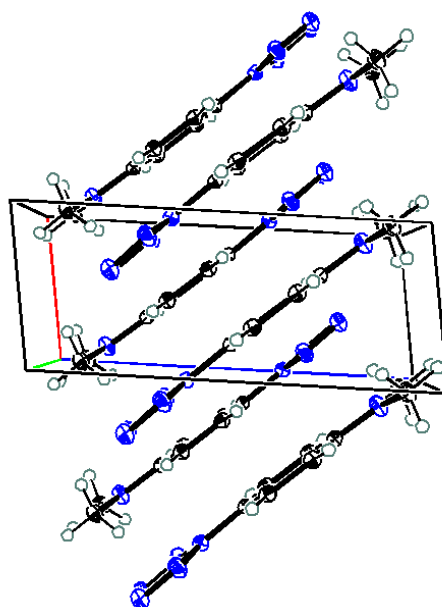

1

2 **Figure S8.** Crystal structure of **1**.

3

|                        |                                                                                                                    |
|------------------------|--------------------------------------------------------------------------------------------------------------------|
| Empirical formula      | C <sub>8</sub> H <sub>10</sub> N <sub>6</sub>                                                                      |
| Formula weight         | 190.22 g/mol                                                                                                       |
| Temperature            | 100(2) K                                                                                                           |
| Wavelength             | 0.71073 Å                                                                                                          |
| Crystal system         | Monoclinic, P 2 <sub>1</sub> /m                                                                                    |
| Space-group            | P2 <sub>1</sub> /m                                                                                                 |
| Unit cell demensions   | $a=4.0830(12)$ Å $\alpha=90^\circ$<br>$b=10.953(3)$ Å $\beta=98.431(6)^\circ$<br>$c=10.082(3)$ Å $\gamma=90^\circ$ |
| Cell ratio             | $a/b=0.3728$ $b/c=1.864$ $c/a=2.4693$                                                                              |
| Cell volume            | 446.01(20) Å <sup>3</sup>                                                                                          |
| Z                      | 2                                                                                                                  |
| Cal. density           | 1.41635 g/cm <sup>3</sup>                                                                                          |
| Absorption coefficient | 0.097 mm <sup>-1</sup>                                                                                             |
| F(000)                 | 200                                                                                                                |

|                                   |                                                                                                  |
|-----------------------------------|--------------------------------------------------------------------------------------------------|
| Crystal size                      | 0.500 x 0.360 x 0.170 mm                                                                         |
| Theta range for data collection   | 2.042 to 27.431 °                                                                                |
| Limiting indices                  | -5<=h<=5, -13<=k<=14, -13<=l<=7                                                                  |
| Reflections collected / unique    | 3000 / 1075 [R(int) = 0.0192]                                                                    |
| Completeness to theta = 25.242    | 100.0 %                                                                                          |
| Absorption correction             | Semi-empirical from equivalents                                                                  |
| Max. and min. transmission        | 0.75 and 0.69                                                                                    |
| Refinement method                 | Full-matrix least-squares on F <sup>2</sup>                                                      |
| Data / restraints / parameters    | 1075 / 0 / 71                                                                                    |
| Goodness-of-fit on F <sup>2</sup> | 1.086                                                                                            |
| Final R indices [I>2sigma(I)]     | R1 = 0.0362, wR2 = 0.0956                                                                        |
| R indices (all data)              | R1 = 0.0455, wR2 = 0.1016                                                                        |
| Extinction coefficient            | n/a                                                                                              |
| Largest diff. peak and hole       | 0.301 and -0.189 e.Å <sup>-3</sup>                                                               |
| Empirical formula                 | C8 H10 N6                                                                                        |
| Formula weight                    | 190.22 g/mol                                                                                     |
| Temperature                       | 100(2) K                                                                                         |
| Wavelength                        | 0.71073 Å                                                                                        |
| Crystal system                    | Monoclinic, P 21/m                                                                               |
| Space-group                       | P2 <sub>1</sub> /m                                                                               |
| Unit cell demensions              | a=4.0830(12) Å    alpha=90 °<br>b=10.953(3) Å    beta=98.431(6) °<br>c=10.082(3) Å    gamma=90 ° |
| Cell ratio                        | a/b=0.3728<br>b/c=1.864<br>c/a=2.4693                                                            |
| Cell volume                       | 446.01(20) Å <sup>3</sup>                                                                        |
| Z                                 | 2                                                                                                |
| Cal. density                      | 1.41635 g/cm <sup>3</sup>                                                                        |
| Absorption coefficient            | 0.097 mm <sup>-1</sup>                                                                           |
| F(000)                            | 200                                                                                              |
| Crystal size                      | 0.500 x 0.360 x 0.170 mm                                                                         |
| Theta range for data collection   | 2.042 to 27.431 °                                                                                |
| Limiting indices                  | -5<=h<=5, -13<=k<=14, -13<=l<=7                                                                  |
| Reflections collected / unique    | 3000 / 1075 [R(int) = 0.0192]                                                                    |
| Completeness to theta = 25.242    | 100.0 %                                                                                          |
| Absorption correction             | Semi-empirical from equivalents                                                                  |
| Max. and min. transmission        | 0.75 and 0.69                                                                                    |
| Refinement method                 | Full-matrix least-squares on F <sup>2</sup>                                                      |
| Data / restraints / parameters    | 1075 / 0 / 71                                                                                    |
| Goodness-of-fit on F <sup>2</sup> | 1.086                                                                                            |
| Final R indices [I>2sigma(I)]     | R1 = 0.0362, wR2 = 0.0956                                                                        |
| R indices (all data)              | R1 = 0.0455, wR2 = 0.1016                                                                        |
| Extinction coefficient            | n/a                                                                                              |
| Largest diff. peak and hole       | 0.301 and -0.189 e.Å <sup>-3</sup>                                                               |

1 **Table S1.** Crystal data and structure refinement for **1**.

2

3

4



| Bond length | (Å)        | Bond length | (Å)        |
|-------------|------------|-------------|------------|
| N1-C2       | 1.368(2)   | C1-H1b      | 0.9800     |
| N1-C1       | 1.4560(13) | C1-H1c      | 0.9800     |
| N1-C1'      | 1.4560(13) | C2-C3       | 1.4197(12) |
| N2-N3       | 1.3262(12) | C2-C3'      | 1.4197(12) |
| N2-N3'      | 1.3262(12) | C3-C4       | 1.3819(16) |
| N2-C5       | 1.4333(15) | C3-H3       | 0.9500     |
| N3-N4       | 1.3111(15) | C4-C5       | 1.3914(13) |
| N4-N4'      | 1.344(2)   | C4-H4       | 0.9500     |
| C1-H1a      | 0.98000    | C5-C4'      | 1.3914(13) |

1 **Table S2.** Bond length (Å) in crystal for **1**.

2

| Bong angles | (°)        | Bong angles | (°)        |
|-------------|------------|-------------|------------|
| C2-N1-C1    | 120.36(7)  | H1b-C1-H1c  | 109.500    |
| C2-N1-C1'   | 120.35(7)  | N1-C2-C3'   | 121.32(7)  |
| C1'-N1-C1   | 119.02(13) | N1-C2-C3    | 121.30(7)  |
| N3'-N2-N3   | 111.72(13) | C3'-C2-C3   | 117.39(14) |
| N3'-N2-C5   | 124.13(6)  | C4-C3-C2    | 123.14(10) |
| N3-N2-C5    | 124.13(6)  | C4-C3-H3    | 119.400    |
| N4-N3-N2    | 105.2(1)   | C2-C3-H3    | 119.400    |
| N3-N4-N4'   | 108.95(7)  | C3-C4-C5    | 119.83(10) |
| N1-C1-H1a   | 109.500    | C3-C4-H4    | 120.100    |
| N1-C1-H1b   | 109.500    | C5-C4-H4    | 120.100    |
| N1-C1-H1c   | 109.500    | C4-C5-C4'   | 120.68(14) |
| H1a-C1-H1b  | 109.500    | C4-C5-N2    | 119.64(7)  |
| H1a-C1-H1c  | 109.500    | C4'-C5-N2   | 119.64(7)  |

3 **Table S3.** Bond angles (°) in crystal for **1**.

4

5

6

7

1 **7. Calculation detail**

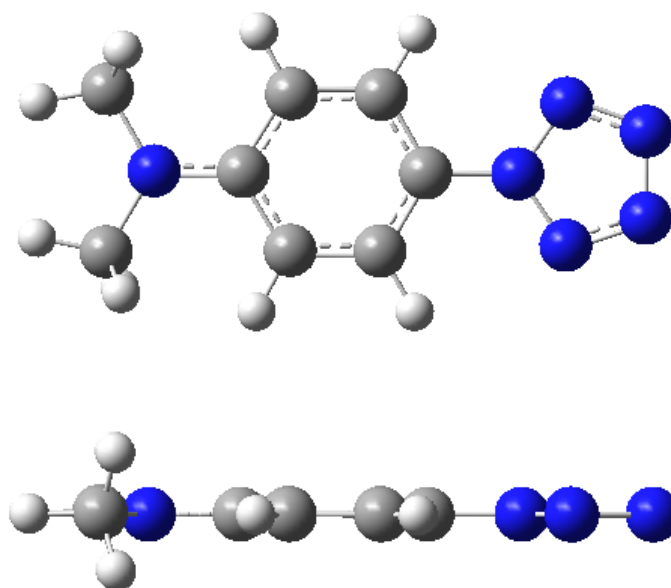

2 **Figure S9.** Theoretical optimized geometry of **1**.

3

| Bond length | (Å)    | Bond length | (Å)    |
|-------------|--------|-------------|--------|
| N1-C2       | 1.3778 | C1-H1b      | 1.0909 |
| N1-C1       | 1.4537 | C1-H1c      | 1.0994 |
| N1-C1'      | 1.4537 | C2-C3       | 1.4173 |
| N2-N3       | 1.3319 | C2-C3'      | 1.4173 |
| N2-N3'      | 1.3319 | C3-C4       | 1.3868 |
| N2-C5       | 1.4229 | C3-H3       | 1.0827 |
| N3-N4       | 1.3031 | C4-C5       | 1.3967 |
| N4-N4'      | 1.3443 | C4-H4       | 1.0839 |
| C1-H1a      | 1.0985 | C5-C4'      | 1.3967 |

4 **Table S4.** Bond length (Å) by DFT method B3LYP/6-31G(d) level.

5

| Bong angles | (°)    | Bong angles | (°)    |
|-------------|--------|-------------|--------|
| C2-N1-C1    | 120.90 | H1b-C1-H1c  | 107.98 |
| C2-N1-C1'   | 120.90 | N1-C2-C3'   | 121.34 |
| C1'-N1-C1   | 119.73 | N1-C2-C3    | 121.34 |
| N3'-N2-N3   | 111.41 | C3'-C2-C3   | 117.32 |

|            |        |           |        |
|------------|--------|-----------|--------|
| N3'-N2-C5  | 124.30 | C4-C3-C2  | 128.26 |
| N3-N2-C5   | 124.30 | C4-C3-H3  | 120.39 |
| N4-N3-N2   | 105.11 | C2-C3-H3  | 120.39 |
| N3-N4-N4'  | 109.19 | C3-C4-C5  | 119.90 |
| N1-C1-H1a  | 111.66 | C3-C4-H4  | 120.21 |
| N1-C1-H1b  | 109.15 | C5-C4-H4  | 119.89 |
| N1-C1-H1c  | 111.99 | C4-C5-C4' | 120.19 |
| H1a-C1-H1b | 107.85 | C4-C5-N2  | 119.91 |
| H1a-C1-H1c | 108.06 | C4'-C5-N2 | 119.91 |

1 **Table S5.** Bond angles ( $^{\circ}$ ) by DFT method B3LYP/6-31G(d) level.

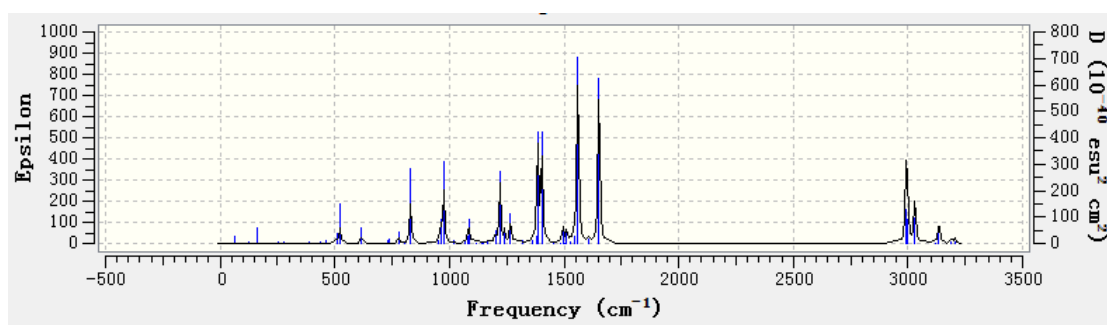

2 **Figure S10.** Simulated IR spectrum of **1**.

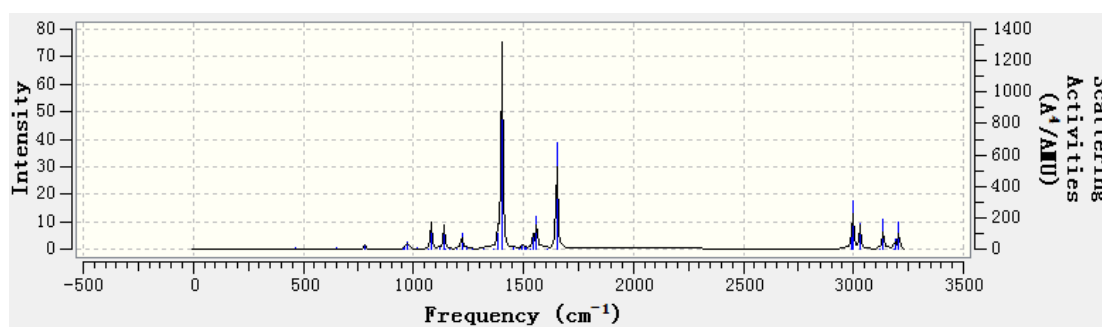

3 **Figure S11.** Simulated Raman spectrum of **1**.

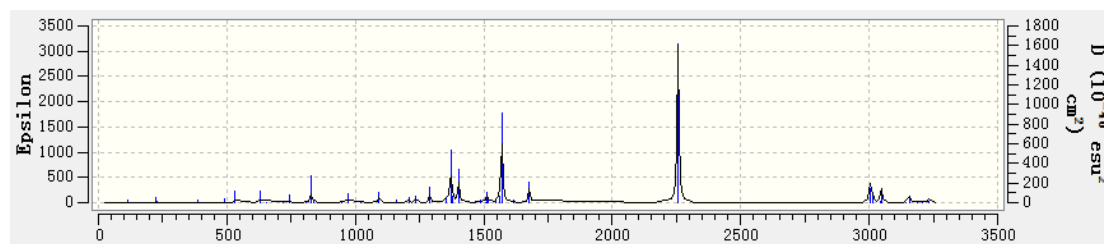

4 **Figure S12.** Simulated IR spectrum of **2**.

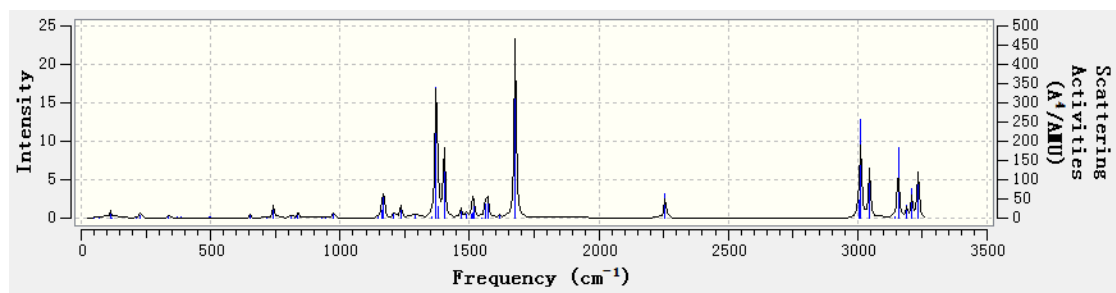

1 **Figure S13.** Simulated Raman spectrum of **2**.
